# Supplementary material for: Synthesis and Characterization of Phosphinecarboxamide and Phosphinecarbothioamide, and Their Complexation with Palladium(II) Complex
Source: MDPI journal article supplement (doi:10.3390/molecules27175564), 2022-08-29

## SUPPORTING INFORMATION

| Table of Contents                                                                                   | Page  |
|-----------------------------------------------------------------------------------------------------|-------|
| $^{31}\text{P}$ NMR spectra ( $\text{CDCl}_3$ , 161.70 MHz) of <b>3</b> at 50 °C, 20 °C, and -50 °C | S2    |
| van't Hoff plots for <b>3</b> and <b>5</b>                                                          | S2    |
| NMR spectra of all new compounds                                                                    | S3-S9 |

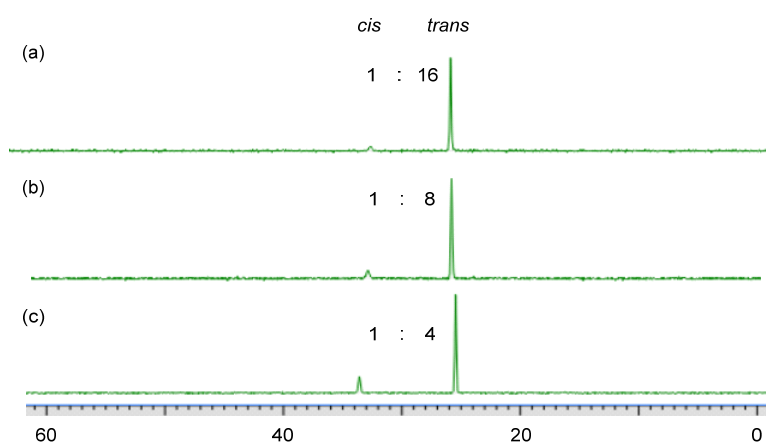

Figure S1.  $^{31}\text{P}$  NMR spectra (161.70 MHz,  $\text{CDCl}_3$ ) of **3** at 50 °C (a), 20 °C (b), and -50 °C (c).

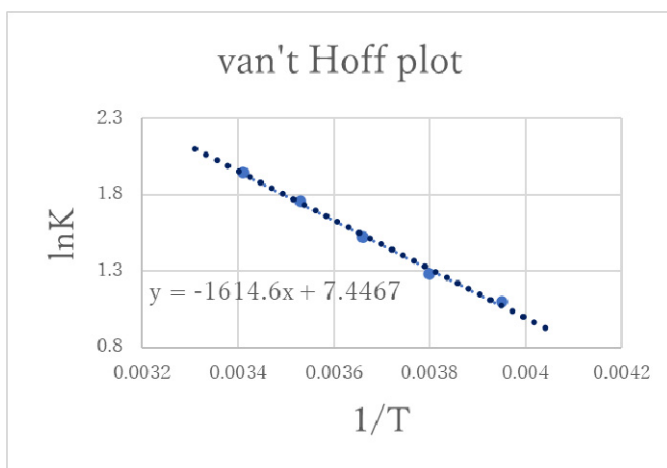

Figure S2. van't Hoff plots for 3.

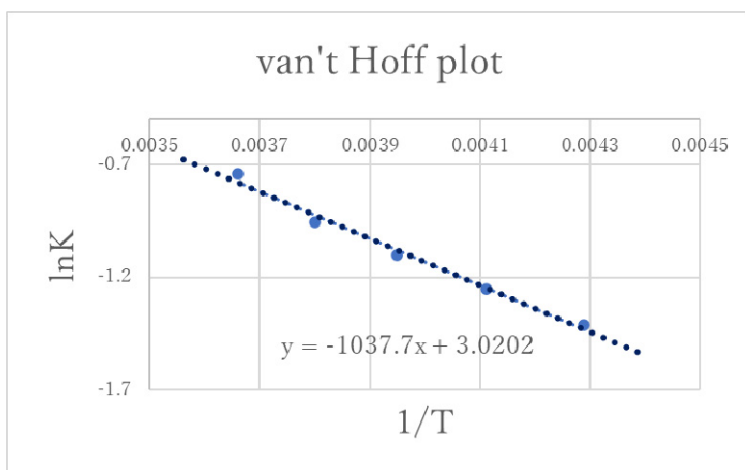

Figure S3. van't Hoff plots for 5.

NMR spectra of all new compounds

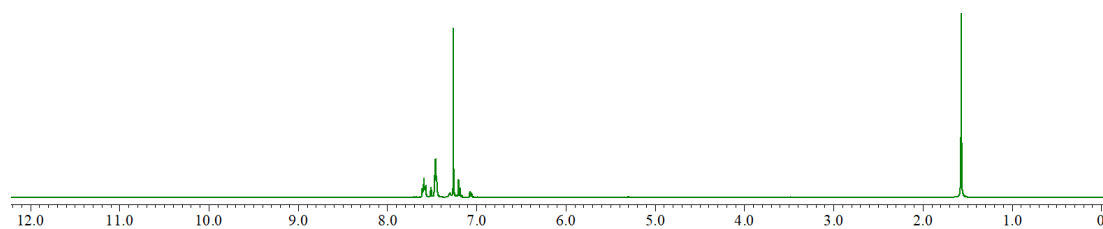

Figure S4.  $^1\text{H}$  NMR spectrum (400 MHz,  $\text{CDCl}_3$ , 20 °C) of **1h**.

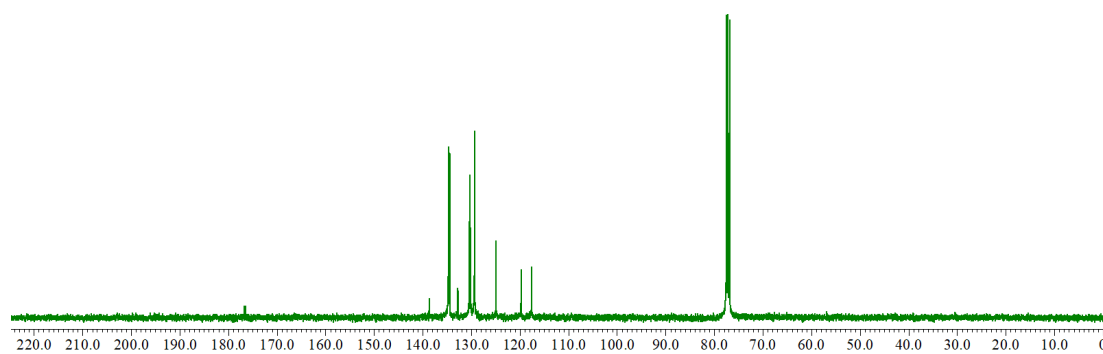

Figure S5.  $^{13}\text{C}$  NMR spectrum (100.4 MHz,  $\text{CDCl}_3$ , 20 °C) of **1h**.

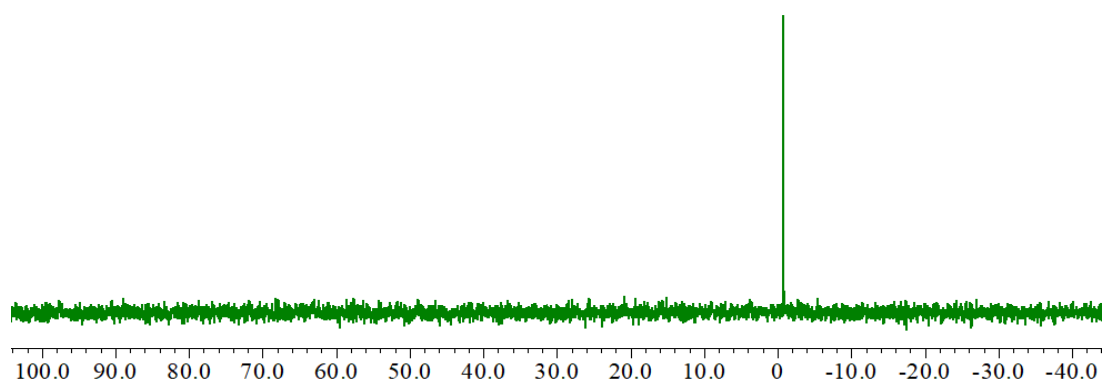

Figure S6.  $^{31}\text{P}\{^1\text{H}\}$  NMR spectrum (161.70 MHz,  $\text{CDCl}_3$ , 20 °C) of **1h**.

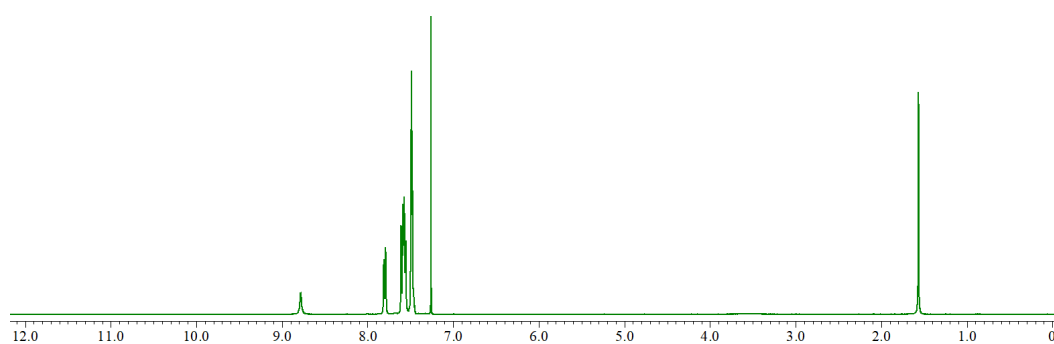

Figure S7.  $^1\text{H}$  NMR spectrum (400 MHz,  $\text{CDCl}_3$ , 20  $^\circ\text{C}$ ) of **2e**.

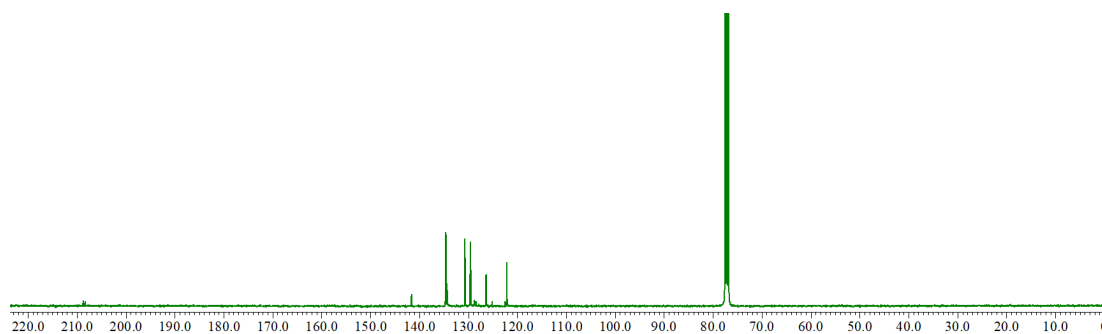

Figure S8.  $^{13}\text{C}$  NMR spectrum (100.4 MHz,  $\text{CDCl}_3$ , 20  $^\circ\text{C}$ ) of **2e**.

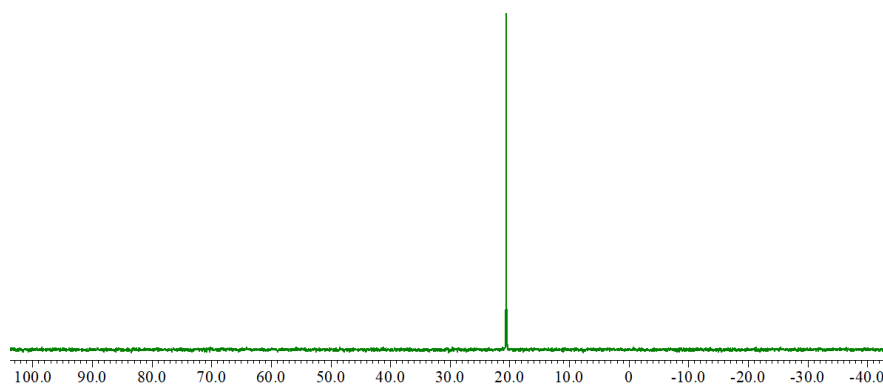

Figure S9.  $^{31}\text{P}\{^1\text{H}\}$  NMR spectrum (161.70 MHz,  $\text{CDCl}_3$ , 20  $^\circ\text{C}$ ) of **2e**.

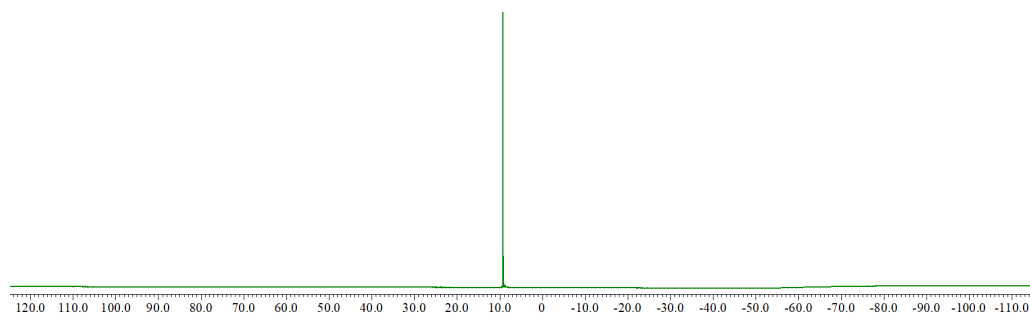

Figure S10.  $^{19}\text{F}$  NMR spectrum (376.95 MHz,  $\text{CDCl}_3$ , 20  $^\circ\text{C}$ ) of **2e**.

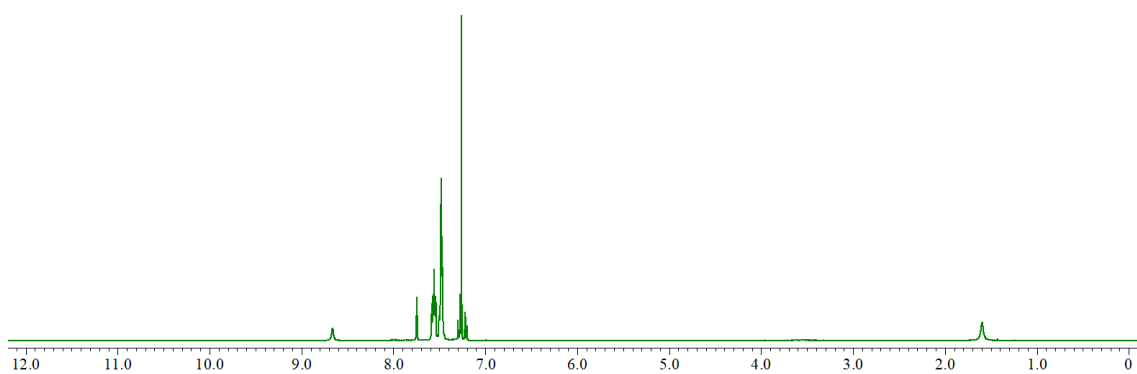

Figure S11.  $^1\text{H}$  NMR spectrum (400 MHz,  $\text{CDCl}_3$ , 20  $^\circ\text{C}$ ) of **2h**.

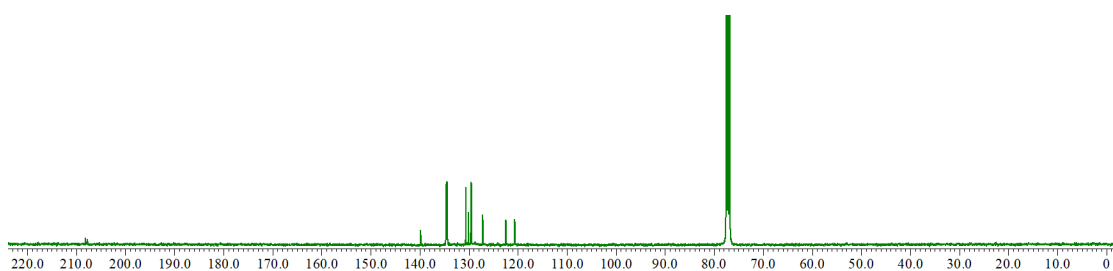

Figure S12.  $^{13}\text{C}$  NMR spectrum (100.4 MHz,  $\text{CDCl}_3$ , 20  $^\circ\text{C}$ ) of **2h**.

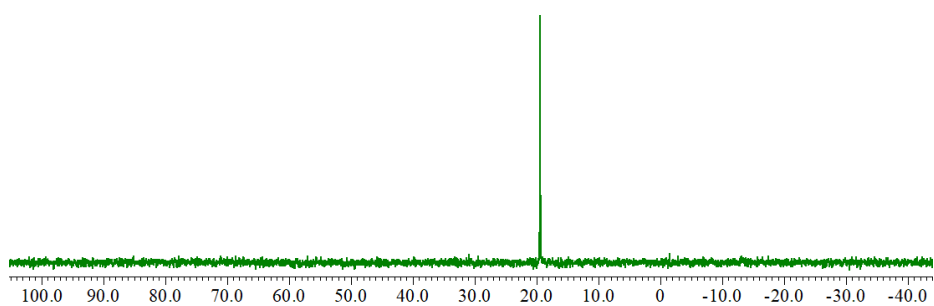

Figure S13.  $^{31}\text{P}\{^1\text{H}\}$  NMR spectrum (161.70 MHz,  $\text{CDCl}_3$ , 20  $^\circ\text{C}$ ) of **2h**.

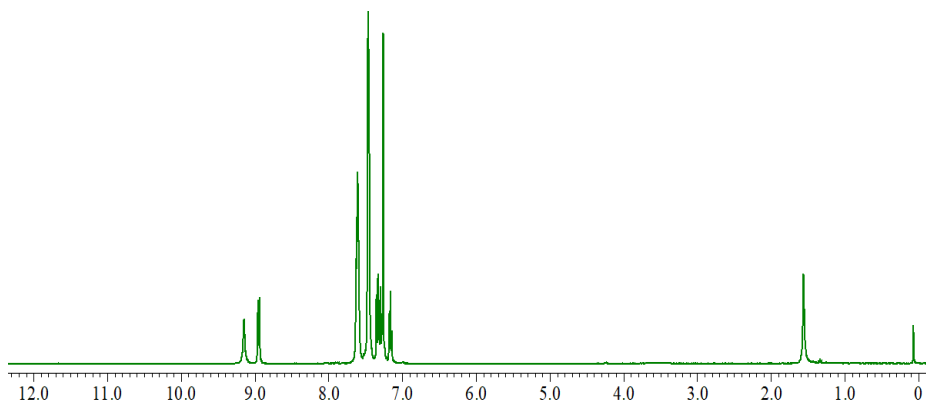

Figure S14.  $^1\text{H}$  NMR spectrum (400 MHz,  $\text{CDCl}_3$ , 20  $^\circ\text{C}$ ) of **2i**.

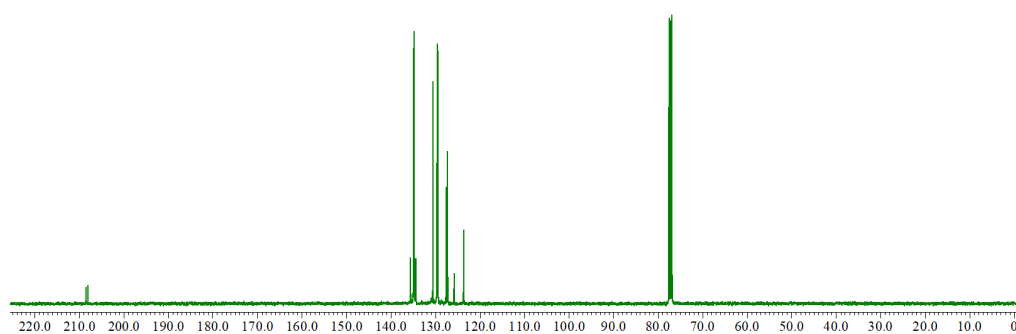

Figure S15.  $^{13}\text{C}$  NMR spectrum (100.4 MHz,  $\text{CDCl}_3$ , 20  $^\circ\text{C}$ ) of **2i**.

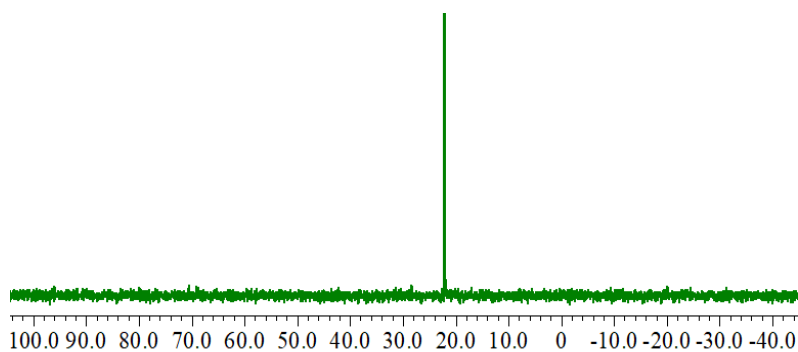

Figure S16.  $^{31}\text{P}\{^1\text{H}\}$  NMR spectrum (161.70 MHz,  $\text{CDCl}_3$ , 20  $^\circ\text{C}$ ) of **2i**.

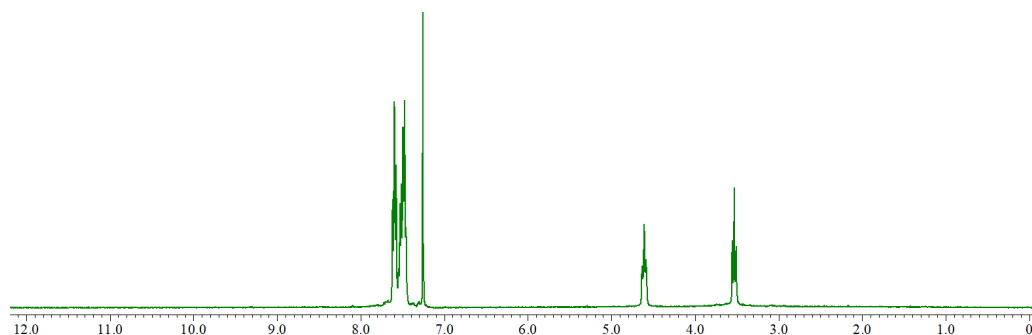

Figure S17.  $^1\text{H}$  NMR spectrum (400 MHz,  $\text{CDCl}_3$ , 20  $^\circ\text{C}$ ) of **2j**.

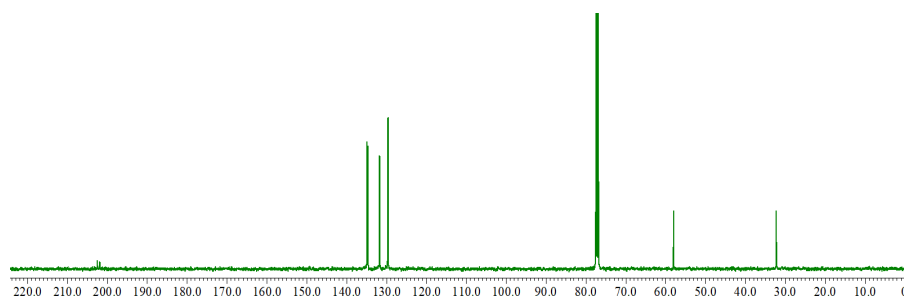

Figure S18.  $^{13}\text{C}$  NMR spectrum (100.4 MHz,  $\text{CDCl}_3$ , 20  $^\circ\text{C}$ ) of **2j**.

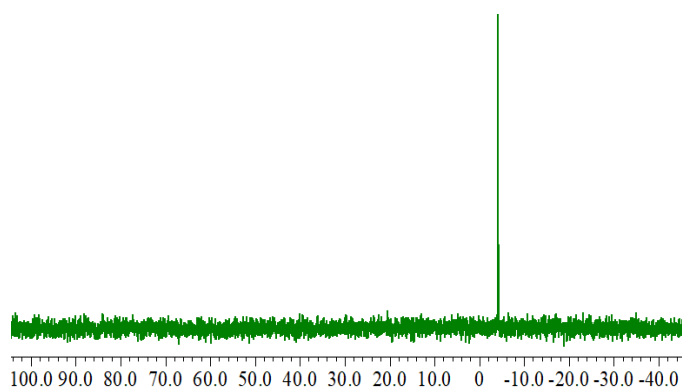

Figure S19.  $^{31}\text{P}\{^1\text{H}\}$  NMR spectrum (161.70 MHz,  $\text{CDCl}_3$ , 20 °C) of **2j**.

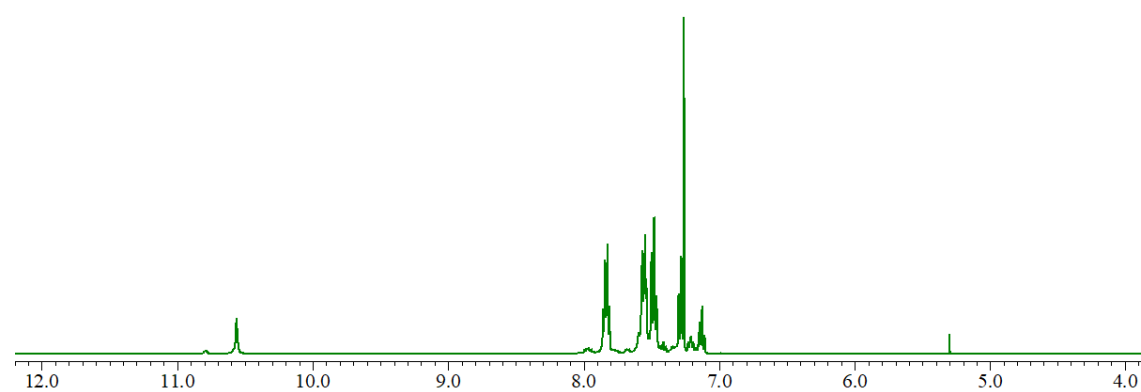

Figure S20.  $^1\text{H}$  NMR spectrum (400 MHz,  $\text{CDCl}_3$ , 20 °C) of **3**.

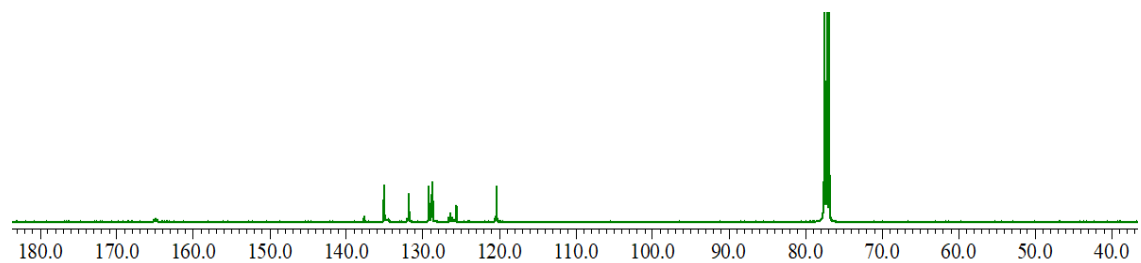

Figure S21.  $^{13}\text{C}\{^1\text{H}\}$  NMR spectrum (100.4 MHz,  $\text{CDCl}_3$ , 20 °C) of **3**.

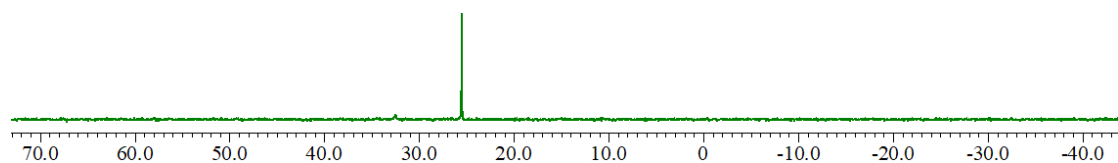

Figure S22.  $^{31}\text{P}\{^1\text{H}\}$  NMR spectrum (162 MHz,  $\text{CDCl}_3$ , 20 °C) of **3**.

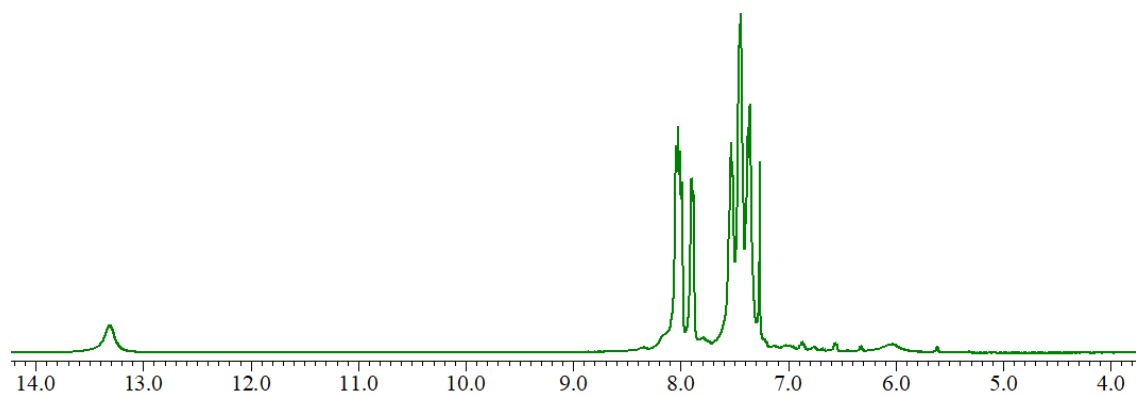

Figure S23.  $^1\text{H}$  NMR spectrum (400 MHz,  $\text{CDCl}_3$ ,  $-50^\circ\text{C}$ ) of **4**.

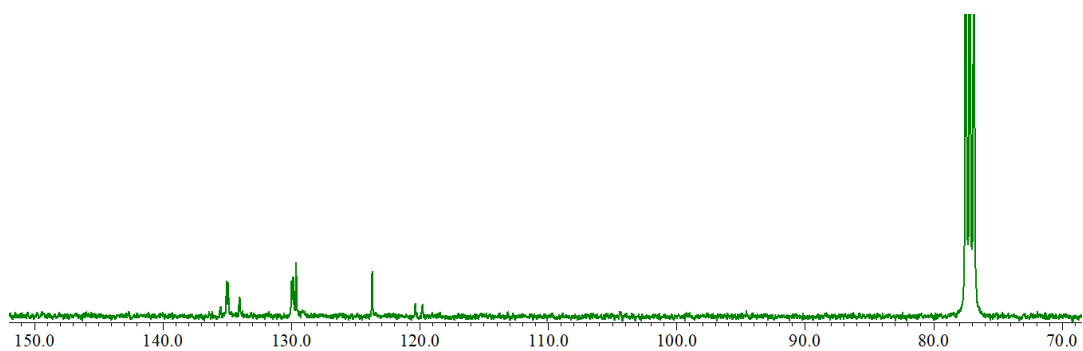

Figure S24.  $^{13}\text{C}\{^1\text{H}\}$  NMR spectrum (100.4 MHz,  $\text{CDCl}_3$ ,  $20^\circ\text{C}$ ) of **4**.

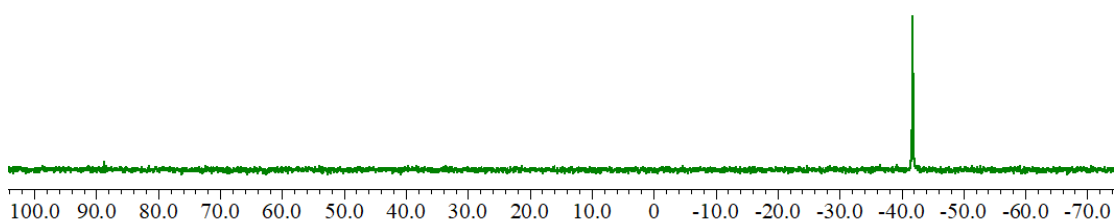

Figure S25.  $^{31}\text{P}\{^1\text{H}\}$  NMR spectrum (162 MHz,  $\text{CDCl}_3$ ,  $20^\circ\text{C}$ ) of **4**.



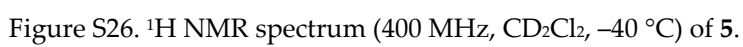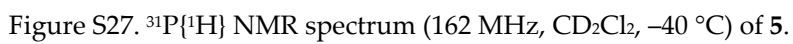

Supplement: s1 [file s1]
